# Supplementary material for: Elevated fruit nitrogen impairs oil biosynthesis in olive (Olea europaea L.)
Source: PubMed Central journal article supplement (PMC10347680; doi:10.3389/fpls.2023.1180391), 2023-06-30
Supplement: DataSheet_1.pdf [file DataSheet_1.pdf]

**Table S1: Seasonal fruit yields (kg tree<sup>-1</sup>) of the controlled experiment.** Numbers are mean values of 6 replicates (trees) in 2007 and 3 replicates on 2008-2009 ± standard error of the mean.

| <b>N level</b> | <b>2007</b> | <b>2008</b> | <b>2009</b> |
|----------------|-------------|-------------|-------------|
| <b>N1</b>      | 0.0 ± 0.0   | 0.8 ± 0.2   | 0.1 ± 0.0   |
| <b>N2</b>      | 1.9 ± 0.2   | 10.2 ± 2.1  | 3.7 ± 0.6   |
| <b>N3</b>      | 2.7 ± 0.4   | 16.2 ± 2.9  | 13.2 ± 1.8  |
| <b>N4</b>      | 3.3 ± 0.4   | 25.9 ± 7.5  | 9.4 ± 4.3   |
| <b>N5</b>      | 2.9 ± 0.5   | 15.9 ± 5.0  | 13.4 ± 3.8  |
| <b>N6</b>      | 2.4 ± 0.6   | 18.0 ± 1.0  | 21.2 ± 1.5  |
| <b>N7</b>      | 2.3 ± 0.5   | 10.7 ± 3.6  | 11.3 ± 3.2  |
| <b>N8</b>      | 1.1 ± 0.2   | 5.8 ± 2.0   | 9.1 ± 1.7   |

**Table S2: Seasonal fruit yields (kg ha<sup>-1</sup>) of the field experiment.** Numbers are mean values of 14 replicates (trees) ± standard error of the mean.

| <b>N level (kg ha<sup>-1</sup>)</b> | <b>2011</b> | <b>2012</b> | <b>2013</b> | <b>2014</b> | <b>2015</b> | <b>2016</b> |
|-------------------------------------|-------------|-------------|-------------|-------------|-------------|-------------|
| <b>0,40*</b>                        | 16.9 ± 1.6  | 12.3 ± 1.5  | 12.8 ± 2.2  | 8.2 ± 2.2   | 6.2 ± 2.1   | 4.1 ± 1.3   |
| <b>75</b>                           | 13.8 ± 1.6  | 16.5 ± 1.5  | 10.8 ± 1.9  | 15.3 ± 2.2  | 5.1 ± 1.7   | 11.1 ± 1.6  |
| <b>150</b>                          | 15.4 ± 1.7  | 15.0 ± 1.2  | 15.1 ± 2.3  | 13.5 ± 2.3  | 9.0 ± 2.3   | 11.8 ± 1.9  |
| <b>300</b>                          | 16.8 ± 0.7  | 11.3 ± 2.0  | 15.9 ± 2.5  | 7.5 ± 2.3   | 10.7 ± 2.3  | 9.9 ± 1.9   |

\* Plots did not receive N fertilization on 2011-2014 seasons, and on 2015-2016 seasons fertilized with an annual amount of 40 kg ha<sup>-1</sup>.
